# Supplementary material for: Clinical Role of Upfront F-18 FDG PET/CT in Determining Biopsy Sites for Lung Cancer Diagnosis
Source: MDPI journal article supplement (doi:10.3390/diagnostics14020153), 2024-01-09
Supplement: s1 [file s1]

Table S1. Biopsy outcomes: sample adequacy rate and diagnostic accuracy with associated factors

| Variables                 | Adequate biopsy (n = 1265)    | Inadequate biopsy (n = 32)  | P-value |
|---------------------------|-------------------------------|-----------------------------|---------|
| Sex                       |                               |                             | 0.285   |
| Male                      | 898 (71.0)                    | 26 (81.2)                   |         |
| Female                    | 367 (29.0)                    | 6 (18.8)                    |         |
| Age†, years               | 71.3 ± 10.2                   | 72.2 ± 12.3                 | 0.645   |
| Number of cores obtained† | 1.9 ± 1.0                     | 1.9 ± 1.2                   | 0.801   |
| Guidance modality         |                               |                             | 0.785   |
| CT                        | 368 (29.1)                    | 9 (28.1)                    |         |
| Cone-beam CT              | 113 (8.9)                     | 4 (12.5)                    |         |
| Ultrasound                | 784 (62.0)                    | 19 (59.4)                   |         |
| Operator                  |                               |                             | 0.304   |
| Radiologist A             | 654 (51.7)                    | 20 (62.5)                   |         |
| Radiologist B             | 611 (48.3)                    | 12 (37.5)                   |         |
| Variables                 | Diagnostic success (n = 1211) | Diagnostic failure (n = 86) | P-value |
| Sex                       |                               |                             | 0.297   |
| Male                      | 858 (70.9)                    | 66 (76.7)                   |         |
| Female                    | 353 (29.1)                    | 20 (23.3)                   |         |
| Age†, years               | 71.4 ± 10.2                   | 70.7 ± 10.4                 | 0.561   |
| Number of cores obtained† | 1.9 ± 1.0                     | 1.9 ± 1.2                   | 0.704   |
| Guidance modality         |                               |                             | 0.072   |
| CT                        | 347 (28.7)                    | 30 (34.9)                   |         |
| Cone-beam CT              | 105 (8.7)                     | 12 (14.0)                   |         |
| Ultrasound                | 759 (62.7)                    | 44 (51.2)                   |         |
| Operator                  |                               |                             | 0.686   |
| Radiologist A             | 627 (51.8)                    | 47 (54.7)                   |         |
| Radiologist B             | 584 (48.2)                    | 39 (45.3)                   |         |

Note—Except where otherwise indicated, data are number with percentage in parentheses.

† Continuous variables were presented as mean ± standard deviation variables.

**Disclaimer/Publisher's Note:** The statements, opinions and data contained in all publications are solely those of the individual author(s) and contributor(s) and not of MDPI and/or the editor(s). MDPI and/or the editor(s) disclaim responsibility for any injury to people or property resulting from any ideas, methods, instructions or products referred to in the content.
